# Supplementary material
Source: PubMed Central journal article supplement (PMC7068668)
Supplement: jamaotolaryngolheadnecksurg-146-421-s001.pdf [file jamaotolaryngolheadnecksurg-146-421-s001.pdf]

## Supplementary Online Content

Miriam C, Ovesen T. Systemic vs intratympanic corticosteroids in first-line treatment of idiopathic sudden sensorineural hearing loss: a systematic review and meta-analysis. *JAMA Otolaryngol*. Published online March 12, 2020.  
doi:10.1001/jamaoto.2020.0047

**eTable 1.** Study and patient characteristics

**eTable 2.** Risk of bias in the included studies investigating the effect of systemic *or* intratympanic treatment with corticosteroids as first-line therapy of ISSNHL

**eTable 3.** Risk of bias in the included studies investigating the effect of systemic *or* intratympanic *or* combined treatment with corticosteroids as first-line therapy of ISSNHL

**eFigure.** Study inclusion parameters

**eReferences.**

This supplementary material has been provided by the authors to give readers additional information about their work.

**eTable 1.** Study and patient characteristics.

| Study and year                  | Number of patients         | Follow up                        | Mean time to treatment $\pm$ SD                              | Goodman's criteria | Mean Age $\pm$ SD                                                 |
|---------------------------------|----------------------------|----------------------------------|--------------------------------------------------------------|--------------------|-------------------------------------------------------------------|
| Rauch et al. [1]                | IT: 129<br>ST: 121         | 2 months                         | IT: 7.0 $\pm$ NA<br>ST: 6.7 $\pm$ NA                         | Severe             | IT: 51.3 $\pm$ NA<br>ST: 50.4                                     |
| Hong, Park, and Lee. [2]        | IT: 32<br>ST: 31           | 3 months                         | IT: 3.4 $\pm$ NA<br>ST: 3.9 $\pm$ NA                         | Severe             | IT: 56.9 $\pm$ NA<br>ST: 56.2 $\pm$ NA                            |
| Swachia, Sharma, and Singh. [3] | IT: 20<br>ST: 22           | 2 months                         | IT: NA<br>ST: NA                                             | Moderate to severe | NA                                                                |
| Gundogan et al. [4]             | ST: 36<br>CB: 37           | 1 month                          | ST: 5.1 $\pm$ 3.5<br>CB: 4.7 $\pm$ 4.0                       | Severe             | ST: 51.6 $\pm$ 16.8<br>CB: 52.3 $\pm$ 12.9                        |
| Tsounis et al. [5]              | IT: 34<br>ST: 35<br>CB: 33 | 90 days                          | IT: 4.6 $\pm$ 3.0<br>ST: 3.1 $\pm$ 3.0<br>CB: 4.0 $\pm$ 3.9  | Severe             | IT: 53.2 $\pm$ 12.0<br>ST: 50.1 $\pm$ 17.3<br>CB: 51.7 $\pm$ 15.8 |
| Ahn et al. [6]                  | ST: 60<br>CB: 60           | NA                               | ST: 7.1 $\pm$ 4.1<br>CB: 6.5 $\pm$ 3.9                       | Severe             | ST: 45.9 $\pm$ 14.7<br>CB: 48.6 $\pm$ 15.4                        |
| Lim et al. [7]                  | IT: 20<br>ST: 20<br>CB: 20 | IT: 21 d<br>ST: 17 d<br>CB: 21 d | IT: 10.1 $\pm$ 8.1<br>ST: 5.4 $\pm$ 3.1<br>CB: 9.6 $\pm$ 7.5 | Moderate to severe | IT: 53.3 $\pm$ 15.3<br>ST: 51.3 $\pm$ 14.5<br>CB: 47.8 $\pm$ 14.2 |

**eTable 2.** Risk of bias in the included studies investigating the effect of systemic *or* intratympanic treatment with corticosteroids as first-line therapy of ISSNHL.

Red, yellow and green correspond to a **high risk**, **unknown risk** and **low risk** of bias, respectively.

| Risk of bias                                              | Rauch et al., 2011 [1]                                                                | Hong, Park, and Lee, 2009 [2]                                              | Swachia, Sharma, and Singh, 2016 [3]                       |
|-----------------------------------------------------------|---------------------------------------------------------------------------------------|----------------------------------------------------------------------------|------------------------------------------------------------|
| Random sequence generation (selection bias)               | Permuted block randomization. The randomization codes were computer generated.        | Quote: “.. treatment was assigned for patients alternatively and randomly” | Random sequence generation was not described               |
| Allocation concealment (selection bias)                   | Only personnel at the data coordinating center had access to the randomization codes. | Allocation was not concealed                                               | Allocation concealment was not described                   |
| Blinding of participants and personnel (performance bias) | Randomization was known to key staff and patients                                     | Randomization was known to physicians and patients                         | Randomization was known to key staff and patients          |
| Blinding of outcome assessment (detection bias)           | Outcome assessors were blinded                                                        | Outcome assessors were blinded                                             | Blinding of outcome assessor was not described             |
| Incomplete outcome data addressed (attrition bias)        | 16/250 withdraw and was well described                                                | 4/38 and 5/37 was lost to follow-up and was not elaborated.                | There was no incomplete or missing data                    |
| Selective reporting bias (reporting bias)                 | Consistency between outcome measure in methods and results                            | Consistency between outcome measure in methods and results                 | Consistency between outcome measure in methods and results |

**eTable 3.** Risk of bias in the included studies investigating the effect of systemic *or* intratympanic *or* combined treatment with corticosteroids as first-line therapy of ISSNHL.

| Risk of bias                                              | Gundogan et al., 2013 [4]                                              | Tsounis et al., 2018 [5]                                                              | Ahn et al., 2008 [6]                              | Lim et al., 2013 [7]                                                  |
|-----------------------------------------------------------|------------------------------------------------------------------------|---------------------------------------------------------------------------------------|---------------------------------------------------|-----------------------------------------------------------------------|
| Random sequence generation (selection bias)               | Block randomization                                                    | Randomization sequence was computer generated                                         | Random sequence generation was not described      | Consecutive allocated by visit sequence but was not described further |
| Allocation concealment (selection bias)                   | Allocation was not concealed                                           | Random numbers placed in closed envelopes and given sequentially to patients          | Allocation concealment was not described          | Allocation was due to alternation or rotation                         |
| Blinding of participants and personnel (performance bias) | Randomization was known to key staff and patients                      | Randomization was known to key staff and patients                                     | Randomization was known to key staff and patients | Randomization was known to key staff and patients                     |
| Blinding of outcome assessment (detection bias)           | Blinding of outcome assessor was not described                         | Blinding of outcome assessor was not described – audiological assessor was blinded    | Blinding of outcome assessor was not described    | Outcome assessors were blinded                                        |
| Incomplete outcome data addressed (attrition bias)        | 3/40 and 3/39 was lost to follow and was unlikely to influence outcome | 5/40, 6/40 and 7/40 withdraw but was well described and unlikely to influence outcome | No missing data                                   | No missing data                                                       |
| Selective reporting bias (reporting bias)                 | Consistency between outcome measure in methods and results             | Consistency between outcome measure in methods and results                            | Length of follow up was not reported              | Consistency between outcome measure in methods and results            |

**eFigure.** Study Inclusion Parameters

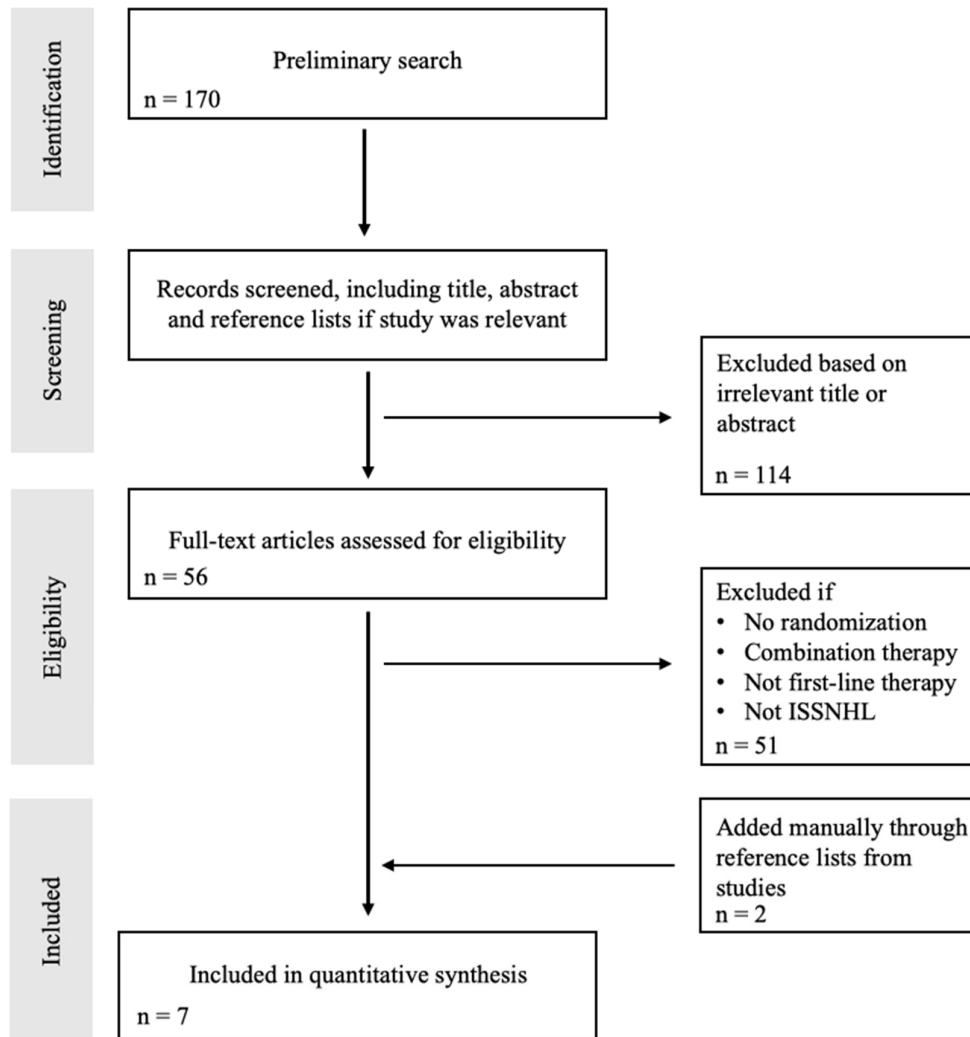

## eReferences

- [1] Rauch SD, Halpin CF, Antonelli PJ, Babu S, Carey JP, Gantz BJ, et al. Oral vs intratympanic corticosteroid therapy for idiopathic sudden sensorineural hearing loss: a randomized trial. *JAMA* 2011;305:2071–9. doi:10.1001/jama.2011.679.
- [2] Hong SM, Park CH, Lee JH. Hearing outcomes of daily intratympanic dexamethasone alone as a primary treatment modality for ISSHL. *Otolaryngol Head Neck Surg* 2009;141:579–83. doi:10.1016/j.otohns.2009.08.009.
- [3] Swachia K, Sharma D, Singh J. Efficacy of oral vs. intratympanic corticosteroids in sudden sensorineural hearing loss. *J Basic Clin Physiol Pharmacol* 2016;27:371–7. doi:10.1515/jbcpp-2015-0112.
- [4] Gundogan O, Pinar E, Imre A, Ozturkcan S, Cokmez O, Yigiter AC. Therapeutic efficacy of the combination of intratympanic methylprednisolone and oral steroid for idiopathic sudden deafness. *Otolaryngol Head Neck Surg* 2013;149:753–8. doi:10.1177/0194599813500754.
- [5] Tsounis M, Psillas G, Tsalighopoulos M, Vital V, Maroudias N, Markou K. Systemic, intratympanic and combined administration of steroids for sudden hearing loss. A prospective randomized multicenter trial. *Eur Arch Otorhinolaryngol* 2018;275:103–10. doi:10.1007/s00405-017-4803-5.
- [6] Ahn JH, Yoo MH, Yoon TH, Chung JW. Can intratympanic dexamethasone added to systemic steroids improve hearing outcome in patients with sudden deafness? *Laryngoscope* 2008;118:279–82. doi:10.1097/MLG.0b013e3181585428.
- [7] Lim HJ, Kim YT, Choi SJ, Lee J Bin, Park HY, Park K, et al. Efficacy of 3 different steroid treatments for sudden sensorineural hearing loss: a prospective, randomized trial. *Otolaryngol Head Neck Surg* 2013;148:121–7. doi:10.1177/0194599812464475.
